# Supplementary material for: Evolutionary trends in the vertebral morphology of extant Delphinidae
Source: Research Square preprint supplement (doi:10.21203/rs.3.rs-7420200/v1), 2025-09-02
Supplement: Supplementary file 1 [file d0d2ebf6eea88f604fd4d675.docx]

Table S1. Results (*Kmult*, *Z* values, and levels of significance) for the analysis of phylogenetic signal done on centroid size (CS), mean Procrustes coordinates for species (Proc. Coord), the *n* first PhyPCs (PhyPCs90), and the *n* first PACs (PACs90) that represented 90% of variation. Th: anterior thorax; ThTo: thorax–torso transition; Tm: mid torso; SP: synclinal point; TS: tailstock. Significance levels: *p* < 0.05 (*), *p* < 0.01 (**), *p* ≤ 0.001 (***).

|  | CS | | | Proc. Coord | | | | PhyPCs90 | | | | PACs90 | | | |
| --- | --- | --- | --- | --- | --- | --- | --- | --- | --- | --- | --- | --- | --- | --- | --- |
|  | *K* | Z | | *K* | | Z | | *K* | | Z | | *K* | | Z | |
| Th | 0.537 | | 1.747 | | 0.566 | | 2.614*** | | 0.524 | | 3.254** | | 0.569 | | 3.094** | |
| ThTo | 0.549 | | 0.995 | | 0.487 | | 2.106*** | | 0.458 | | 0.345 | | 0.483 | | 1.880* | |
| Tm | 0.545 | | 1.810* | | 0.784 | | 2.132** | | 0.794 | | 3.129** | | 0.822 | | 3.324** | |
| SP | 0.526 | | 1.704* | | 0.629 | | 2.403*** | | 0.607 | | 4.351*** | | 0.629 | | 4.326** | |
| TS | 0.623 | | 2.071* | | 0.901 | | 1.665** | | 0.878 | | 2.439** | | 0.940 | | 4.121*** | |

Table S2. Results (*R2*, *Z* values, and levels of significance) for the *PGLS* made on: procrustes coordinates (Proc. Coord), and *n* first components of the phylogenetic PCA (PhyPCs). *df*: degrees of freedom, logCS: logarithm of centroid size, H: habitat, R: residuals. Th: anterior thorax; ThTo: thorax–torso transition; Tm: mid torso; SP: synclinal point; TS: tailstock. Significance levels: *p* < 0.05 (*), *p* < 0.01 (**), *p* ≤ 0.001 (***).

|  |  |  | Proc. Coord | | PhyPCs | |
| --- | --- | --- | --- | --- | --- | --- |
|  |  | *df* | *R2* | *Z* | *R2* | *Z* |
| Th | CS | 1 | 0.013 | -1.131 | 0.023 | -0.504 |
|  | Habitat | 4 | 0.15 | -0.080 | 0.217 | 0.923 |
|  | Residuals | 18 | 0.8 |  | 0.726 |  |
| ThTo | CS | 1 | 0.052 | 0.821 | 0.134 | 2.786** |
|  | Habitat | 4 | 0.218 | 0.912 | 0.37 | 3.241*** |
|  | Residuals | 18 | 0.712 |  | 0.474 |  |
| Tm | CS | 1 | 0.026 | -0.101 | 0.037 | 0.711 |
|  | Habitat | 4 | 0.252 | 1.446 | 0.431 | 3.511*** |
|  | Residuals | 18 | 0.688 |  | 0.498 |  |
| SP | CS | 1 | 0.046 | 0.675 | 0.099 | 2.194* |
|  | Habitat | 4 | 0.194 | 0.799 | 0.311 | 3.284** |
|  | Residuals | 18 | 0.709 |  | 0.522 |  |
| TS | CS | 1 | 0.029 | -0.102 | 0.074 | 1.153 |
|  | Habitat | 4 | 0.178 | 0.187 | 0.19 | 0.618 |
|  | Residuals | 18 | 0.765 |  | 0.652 |  |

Table S3. Results (*Z* values and its significance) for the *post hoc* pairwise comparisons for habitat for thorax-torso transition (ThTo), mid torso (Tm), and synclinal point (SP). C: coastal; D: deep diver; M: mixed habitat; O: offshore; RB: rivers and bays. Significance levels: *p* < 0.05 (*), *p* < 0.01 (**).

| **ThTo** | DD | M | O | RB |
| --- | --- | --- | --- | --- |
| C | 1.397 | 2.110* | 2.540** | 1.027 |
| DD | ------ | 2.014* | 2.103* | -1.209 |
| M | ------ | ------ | -0.894 | 1.575 |
| O | ------ | ------ | ------ | 1.380 |
| **Tm** | DD | M | O | RB |
| C | 0.886 | 1.951* | 2.176* | -0.233 |
| DD | ------ | 1.968* | 2.205* | -0.098 |
| M | ------ | ------ | -0.464 | 1.810* |
| O | ------ | ------ | ------ | 1.840* |
| **SP** | DD | M | O | RB |
| C | 2.654** | -0.122 | 1.954* | 0.636 |
| DD | ------ | 2.291* | 2.374* | 0.381 |
| M | ------ | ------ | 0.267 | 0.800 |
| O | ------ | ------ | ------ | 1.004 |
