# Supplementary material for: Evolutionary trends in the vertebral morphology of extant Delphinidae
Source: Research Square preprint supplement (doi:10.21203/rs.3.rs-7420200/v1), 2025-09-02
Supplement: Supplementary file 2 [file e40e86c76431d4af3c8dbf28.xlsx]

## Sheet: Hoja1
Supplemetary Materials 2. Summary for selected components for the five studied regions.
For PhyPCa: Eigenvalues, percetage of explained variance (% Var), and cummulative percetage of explained variance (Cum. % Var)
For PACA: RV score and cummulative percentage of tip dispersion (Cum. % TD)
Th	PhyPCA				PACA
	Eigenvalues	% Var	Cum. % Var		RV	Cum. % TD
Comp1	0.0713682	0.422693	0.422693		0.183967	0.212397
Comp2	0.0253671	0.150242	0.572935		0.0412142	0.461385
Comp3	0.0182397	0.108028	0.680963		0.00815086	0.548239
Comp4	0.0138186	0.0818437	0.762806		0.00136854	0.64532
Comp5	0.00990121	0.0586419	0.821448		0.000298392	0.702546
Comp6	0.00693477	0.0410726	0.862521		0.000198365	0.771143
Comp7	0.0048267	0.0285871	0.891108		9.47889e-05	0.8169
Comp8	0.00372034	0.0220345	0.913143		7.55233e-05	0.846021
Comp9	-------	-------	-------		6.04938e-05	0.885219
Comp10	-------	-------	-------		5.47443e-05	0.906906
ThTo	PhyPCA				PACA
	Eigenvalues	% Var	Cum. % Var		RV	Cum. % TD
Comp1	0.0587647	0.317352	0.317352		0.20676	0.212599
Comp2	0.0501692	0.270933	0.588285		0.0144889	0.390672
Comp3	0.0294285	0.158925	0.74721		0.00389845	0.518722
Comp4	0.0141515	0.0764237	0.823634		0.000529091	0.674116
Comp5	0.0122561	0.0661878	0.889822		0.000412325	0.78779
Comp6	0.00535302	0.0289084	0.91873		0.000299942	0.846791
Comp7	-------	-------	-------		8.87187e-05	0.890034
Comp8	-------	-------	-------		6.56798e-05	0.923907
Tm	PhyPCA				PACA
	Eigenvalues	% Var	Cum. % Var		RV	Cum. % TD
Comp1	0.11919	0.464117	0.464117		0.582338	0.303156
Comp2	0.0493561	0.192189	0.656307		0.00567593	0.443452
Comp3	0.0308869	0.120272	0.776578		0.00550899	0.554904
Comp4	0.0236581	0.092123	0.868701		0.000248794	0.790593
Comp5	0.00977073	0.0380466	0.906748		0.000107107	0.861811
Comp6	-------	-------	-------		5.70483e-05	0.908976
SP	PhyPCA				PACA
	Eigenvalues	% Var	Cum. % Var		RV	Cum. % TD
Comp1	0.0741746	0.291657	0.291657		0.291443	0.0904205
Comp2	0.0642726	0.252722	0.544378		0.0304677	0.330587
Comp3	0.036097	0.141934	0.686313		0.0163015	0.427423
Comp4	0.0259862	0.102178	0.788491		0.000556202	0.703309
Comp5	0.0197256	0.0775614	0.866052		0.000225207	0.792663
Comp6	0.00900613	0.0354123	0.901465		0.000116257	0.842267
Comp7	-------	-------	-------		6.97885e-05	0.869004
Comp8	-------	-------	-------		3.1816e-05	0.883783
Comp9	-------	-------	-------		2.38567e-05	0.920583
TS	PhyPCA				PACA
	Eigenvalues	% Var	Cum. % Var		RV	Cum. % TD
Comp1	0.0867811	0.498966	0.498966		0.483374	0.263856
Comp2	0.0211233	0.121453	0.620419		0.0120749	0.595085
Comp3	0.0135012	0.077628	0.698047		0.00294114	0.636323
Comp4	0.0128223	0.0737246	0.771772		0.000147025	0.732502
Comp5	0.00786546	0.0452241	0.816996		9.33638e-05	0.804362
Comp6	0.00736425	0.0423423	0.859338		4.88467e-05	0.837559
Comp7	0.00556899	0.0320201	0.891358		4.02053e-05	0.865033
Comp8	0.00357564	0.0205589	0.911917		3.36154e-05	0.880396
Comp9	-------	-------	-------		2.57133e-05	0.891751
Comp10	-------	-------	-------		1.92165e-05	0.913067
