# Supplementary material for: Evolutionary trends in the vertebral morphology of extant Delphinidae
Source: Research Square preprint supplement (doi:10.21203/rs.3.rs-7420200/v1), 2025-09-02
Supplement: Supplementary file 3 [file feda55a946017aac197910f4.docx]

Supplementary Information 1. Examples of the scripts used for the study. A general example is given and particular modifications for regions are included.

library(geomorph)

library(RRPP)

library(Morpho)

library(ape)

library(phytools)

library(MPSEM)

library(readr)

# Loading data

Delphinidae_Data <- read.table("01Th_delphinidae_SoloAd.txt", header=T, dec =".")

Delphinidae_Clasif <-read.csv(file = "01Th_ID_24sp.csv", header = T,sep = ",",dec = ".")

Delphinidae_Clasif$Sp<-as.factor(Delphinidae_Clasif$Sp)

Delphinidae_Clasif$Habitat<-as.factor(Delphinidae_Clasif$Habitat)

# 3D array for Th

Delphinidae_3Darray <- arrayspecs(Delphinidae_Data[,2:ncol(Delphinidae_Data)], 35, 3)

# Semliankdmark matrix for Th

semilmk<-data.frame(before= c(2,6,3,7,4,8,5,24,28,25,29,26,30,27,21,32,15,35), slide= c(6,3,7,4,8,5,9,28,25,29,26,30,27,31,32,33,35,34), after=c(3,7,4,8,5,9,2,25,29,26,30,27,31,24,33,15,34,14))

semilmk<- as.matrix(semilmk)

# 3D array for ThTo, T and SP

Delphinidae_3Darray <- arrayspecs(Delphinidae_Data[,2:ncol(Delphinidae_Data)], 41, 3)

# Semliankdmark matrix for ThTo, Tm and SP

semilmk<-data.frame(before= c(2,6,3,7,4,8,5,22,26,23,27,24,28,25,5,38,14,41,3,34,11,37,19,30,13,33), slide= c(6,3,7,4,8,5,9,26,23,27,24,28,25,29,38,39,41,40,34,35,37,36,30,31,33,32), after=c(3,7,4,8,5,9,2,23,27,24,28,25,29,22,39,16,40,25,35,20,36,23,31,13,32,12))

semilmk<- as.matrix(semilmk)

# 3D array for TS

Delphinidae_3Darray <- arrayspecs(Delphinidae_Data[,2:ncol(Delphinidae_Data)],28, 3)

# Semliankdmark matrix for TS

semilmk<-data.frame(before= c(2,6,3,7,4,8,5,19,23,20,24,21,25,22), slide= c(6,3,7,4,8,5,9,23,20,24,21,25,22,26), after=c(3,7,4,8,5,9,2,20,24,21,25,22,26,19))

semilmk<- as.matrix(semilmk)

# GPA

Delphinidae_GPA <- gpagen(Delphinidae_3Darray,curves = semilmk,ProcD = FALSE )

# Data frame

gdf_delph<-geomorph.data.frame(Delphinidae_GPA,SP=Delphinidae_Clasif$Sp,Subfamily=Delphinidae_Clasif$Subfamily,Habitat=Delphinidae_Clasif$Habitat)

# Pruning of phylogeny used for Th, ThTo, Tm and SP. For the TS, we also pruned C. australis from the three, with the resulting three having 23 sp. The original phylogeny was obtained from McGowen et al. (2020).

FiloMcGowen<-read.tree("1b_trimTree.tre")

pr.species<-c("Delphinus_capensis","Tursiops_aduncus","Sousa_sahulensis","Sotalia_guianensis","Globicephala_melas","Pseudorca_crassidens","Orcaella_brevirostris","Orcaella_heinsohnii","Lagenorhynchus_obliquidens","Lissodelphis_borealis","Orcinus_orca","Phocoena_spinipinnis","Phocoena_dioptrica","Phocoena_phocoena","Neophocaena_phocaenoides","Monodon_monoceros","Delphinapterus_leucas","Pontoporia_blainvillei","Inia_geoffrensis","Lipotes_vexillifer","Mesoplodon_perrini","Mesoplodon_peruvianus","Mesoplodon_densirostris","Mesoplodon_stejnegeri","Mesoplodon_grayi","Mesoplodon_hectori","Mesoplodon_carlhubbsi","Mesoplodon_bowdoini","Mesoplodon_layardii","Mesoplodon_mirus","Mesoplodon_europaeus","Mesoplodon_ginkgodens","Mesoplodon_bidens","Hyperoodon_ampullatus","Ziphius_cavirostris","Tasmacetus_shepherdi","Berardius_bairdii","Platanista_gangetica","Kogia_sima","Kogia_breviceps","Physeter_macrocephalus","Balaenoptera_edeni","Balaenoptera_borealis","Balaenoptera_musculus","Megaptera_novaeangliae","Balaenoptera_physalus","Eschrichtius_robustus","Balaenoptera_bonaerensis","Balaenoptera_acutorostrata","Caperea_marginata","Eubalaena_japonica","Eubalaena_glacialis","Eubalaena_australis","Balaena_mysticetus")

nodes<-sapply(pr.species,grep,x=FiloMcGowen$tip.label)

FiloMcGowen<-drop.tip(FiloMcGowen,pr.species)

FiloMcGowen<-bind.tip(FiloMcGowen, "Cephalorhynchus_cruciger", where = 16, position = 0.5*FiloMcGowen$edge.length[which(FiloMcGowen$edge[,2]==16)], edge.length = 0.5*FiloMcGowen$edge.length[which(FiloMcGowen$edge[,2]==16)])

FiloMcGowen<-bind.tip(FiloMcGowen, "Sousa_plumbea", where = 9, position = 0.5*FiloMcGowen$edge.length[which(FiloMcGowen$edge[,2]==9)], edge.length = 0.5*FiloMcGowen$edge.length[which(FiloMcGowen$edge[,2]==9)])

pr.species<-c("Sousa_chinensis")

nodes<-sapply(pr.species,grep,x=FiloMcGowen$tip.label)

FiloMcGowen_24<-drop.tip(FiloMcGowen,pr.species)

# Species mean shapes for Th, ThTo, Tm and SP. For TS, *L. australis* was removed.

Y1 <- mshape(gdf_delph$coords[,,which(gdf_delph$SP == "Slong")])

Y2 <- mshape(gdf_delph$coords[,,which(gdf_delph$SP == "Sclym")])

Y3 <- mshape(gdf_delph$coords[,,which(gdf_delph$SP == "Lhose")])

Y4 <- mshape(gdf_delph$coords[,,which(gdf_delph$SP == "Ddelp")])

Y5 <- mshape(gdf_delph$coords[,,which(gdf_delph$SP == "Scoeu")])

Y6 <- mshape(gdf_delph$coords[,,which(gdf_delph$SP == "Ttrun")])

Y7 <- mshape(gdf_delph$coords[,,which(gdf_delph$SP == "Sfron")])

Y8 <- mshape(gdf_delph$coords[,,which(gdf_delph$SP == "Satte")])

Y9 <- mshape(gdf_delph$coords[,,which(gdf_delph$SP == "Splum")])

Y10 <- mshape(gdf_delph$coords[,,which(gdf_delph$SP == "Sfluv")])

Y11 <- mshape(gdf_delph$coords[,,which(gdf_delph$SP == "Pelec")])

Y12 <- mshape(gdf_delph$coords[,,which(gdf_delph$SP == "Fatte")])

Y13 <- mshape(gdf_delph$coords[,,which(gdf_delph$SP == "Gmacro")])

Y14 <- mshape(gdf_delph$coords[,,which(gdf_delph$SP == "Ggris")])

Y15 <- mshape(gdf_delph$coords[,,which(gdf_delph$SP == "Sbred")])

Y16 <- mshape(gdf_delph$coords[,,which(gdf_delph$SP == "Ccomm")])

Y17 <- mshape(gdf_delph$coords[,,which(gdf_delph$SP == "Chect")])

Y18 <-mshape(gdf_delph$coords[,,which(gdf_delph$SP=="Caust")])

Y19 <- mshape(gdf_delph$coords[,,which(gdf_delph$SP == "Ccruc")])

Y20 <- mshape(gdf_delph$coords[,,which(gdf_delph$SP == "Cheav")])

Y21 <- mshape(gdf_delph$coords[,,which(gdf_delph$SP == "Aobsc")])

Y22 <- mshape(gdf_delph$coords[,,which(gdf_delph$SP == "Lipero")])

Y23 <- mshape(gdf_delph$coords[,,which(gdf_delph$SP == "Lalbi")])

Y24 <- mshape(gdf_delph$coords[,,which(gdf_delph$SP == "Lacut")])

# Species mean shape array for Th. This was modified for other regions by changing the dimensions of the data: ThTo, Tm, SP: dim = c(41,3,24); TS: dim = c(28,3,23)

YT <- array(c( Y1, Y2, Y3, Y4, Y5, Y6, Y7, Y8, Y9, Y10, Y11, Y12, Y13,Y14, Y15,Y16, Y17, Y18, Y19, Y20, Y21, Y22, Y23,Y24), dim = c(35,3,24), dimnames = list(c(),c(),FiloMcGowen_24$tip.label))

# mean CS per species for Th, ThTo, Tm and SP. For TS, *L. australis* was removed.

CS1 <- mean(gdf_delph$Csize[which(gdf_delph$SP == "Slong")])

CS2 <- mean(gdf_delph$Csize[which(gdf_delph$SP == "Sclym")])

CS3 <- mean (gdf_delph$Csize[which(gdf_delph$SP == "Lhose")])

CS4 <- mean(gdf_delph$Csize[which(gdf_delph$SP == "Ddelp")])

CS5 <- mean (gdf_delph$Csize[which(gdf_delph$SP == "Scoeu")])

CS6 <- mean(gdf_delph$Csize[which(gdf_delph$SP == "Ttrun")])

CS7 <- mean(gdf_delph$Csize[which(gdf_delph$SP == "Sfron")])

CS8 <- mean(gdf_delph$Csize[which(gdf_delph$SP == "Satte")])

CS9 <- mean(gdf_delph$Csize[which(gdf_delph$SP == "Splum")])

CS10 <- mean(gdf_delph$Csize[which(gdf_delph$SP == "Sfluv")])

CS11 <- mean(gdf_delph$Csize[which(gdf_delph$SP == "Gmacro")])

CS12 <- mean(gdf_delph$Csize[which(gdf_delph$SP == "Pelec")])

CS13 <- mean(gdf_delph$Csize[which(gdf_delph$SP == "Fatte")])

CS14 <- mean(gdf_delph$Csize[which(gdf_delph$SP == "Ggris")])

CS15 <- mean(gdf_delph$Csize[which(gdf_delph$SP == "Sbred")])

CS16<- mean(gdf_delph$Csize[which(gdf_delph$SP == "Caust")])

CS17<- mean(gdf_delph$Csize[which(gdf_delph$SP == "Ccruc")])

CS18<- mean(gdf_delph$Csize[which(gdf_delph$SP == "Cheav")])

CS19<- mean(gdf_delph$Csize[which(gdf_delph$SP == "Ccomm")])

CS20<- mean(gdf_delph$Csize[which(gdf_delph$SP == "Chect")])

CS21<- mean(gdf_delph$Csize[which(gdf_delph$SP == "Aobsc")])

CS22<- mean(gdf_delph$Csize[which(gdf_delph$SP == "Lipero")])

CS23<-mean(gdf_delph$Csize[which(gdf_delph$SP == "Lalbi")])

CS24<- mean(gdf_delph$Csize[which(gdf_delph$SP == "Lacut")])

# CS array for Th This was modified for the TS by changing the number of row (nrow).

Cs <-matrix(data=c(CS1,CS2,CS3,CS4,CS5, CS6,CS7, CS8, CS9, CS10, CS11,CS12, CS13,CS14, CS15,CS16,CS17, CS18, CS19,CS20, CS21, CS22, CS23,CS24),nrow = 24,ncol = 1)

rownames(Cs)<-FiloMcGowen_24$tip.label

# Classifiers for species mean shapes. The TS had a different classifier file than other regions.

mean_Clasif <-read.csv(file = "ID_24sp.csv", header = T,sep = ",",dec = ".", na="null")

mean_Clasif$Sp<-as.factor(mean_Clasif$Sp)

mean_Clasif$Habitat<-as.factor(mean_Clasif$Habitat)

# Dataframe including species mean shapes and phylogeny

meanshape_gdf<-geomorph.data.frame(coords=YT, CS=Cs, SP=mean_Clasif$Sp, SF=mean_Clasif$Subfamily,H = mean_Clasif$Habitat, Phy= FiloMcGowen_24)

#Phylomorphospace (PhyloMS), phylogenetic PCA (PhyPCA)and Phylogenetically aligned Component Analysis(PaCA)

Delphinidae_PhyloMS<-gm.prcomp(A=meanshape_gdf$coords,phy =meanshape_gdf$Phy)

Delphinidae_PhyPCA<-gm.prcomp(A=meanshape_gdf$coords,phy =meanshape_gdf$Phy,GLS=TRUE)

Delphinidae_PACA<-gm.prcomp(A=meanshape_gdf$coords,phy =meanshape_gdf$Phy,GLS=TRUE, align.to.phy = TRUE)

# Angles calculations and analysis

PCA<-Delphinidae_PhyloMS$x [,1]

PhyPCA<-Delphinidae_PhyPCA$x [,1]

PACA<-Delphinidae_PACA$x [,1]

angleTest(PCA,PhyPCA)

angleTest(PCA,PACA)

angleTest(PhyPCA,PACA)

#Plot colors

gp <- as.factor(paste(meanshape_gdf$H))

col.gp<-c( "purple","darkorange", "red", "skyblue3","forestgreen")

names(col.gp) <- levels(gp)

col.gp<- col.gp[match(gp, names(col.gp))]

#Plots Morphospace

plot(Delphinidae_PhyloMS, axis1=1, axis2= 2, phylo =TRUE,cex= 3,pch= c(22,22,22,22,22,22,22,22,22,22,21,21,21,21,21,24,24,24,24,24,24,24,23,23), col= "black", bg= col.gp, phylo.par= list( tip.labels=FALSE, node.labels= FALSE, anc.states= FALSE, edge.color= "black", edge.width= 0.9, tip.txt.cex =0.5, tip.txt.adj = c(-0.1, -0.1)))

plot(Delphinidae_PhyPCA, axis1=1, axis2= 2, phylo =TRUE,cex= 3,pch= c(22,22,22,22,22,22,22,22,22,22,21,21,21,21,21,24,24, 24,24,24,24,24,23,23), col= "black", bg= col.gp, phylo.par= list( tip.labels=TRUE, node.labels=FALSE, anc.states= FALSE, edge.color= "black", edge.width= 0.9, tip.txt.cex =0.5, tip.txt.adj = c(-0.1, -0.1) ))

plot(Delphinidae_PACA, axis1=1, axis2= 2, phylo =TRUE,cex= 1.3,pch= c(22,22,22,22,22,22,22,22,22,22,21,21,21,21,21,24,24,24,24,24,24,24,23,23), col= "black", bg= col.gp, phylo.par= list( tip.labels=TRUE, node.labels=FALSE, anc.states= FALSE, edge.color= "black", edge.width= 0.9, tip.txt.cex =0.5, tip.txt.adj = c(-0.1, -0.1) ))

#Phylogenetical signal

Th_physig.DelphinidaeCS<-physignal.z(A= meanshape_gdf$CS, phy= meanshape_gdf$Phy, iter = 999, lambda = c("mean"), seed = NULL, tol = 1e-04, PAC.no = 21, print.progress = FALSE, verbose = FALSE)

summary(Th_physig.DelphinidaeCS)

Th_physig.Delphinidae<-physignal.z(A= meanshape_gdf$coords, phy= meanshape_gdf$Phy, iter = 999, lambda = c("mean"), seed = NULL, tol = 1e-04, PAC.no = 21, print.progress = FALSE, verbose = FALSE)

summary(Th_physig.Delphinidae)

#Selected components. The example is given for the Th. The number of components employed varied between regions. See Supplementary information 2.

#PhyPCA 90% variation

Th_physig.DelphinidaePhyPCA90<-physignal.z(A= Delphinidae_PhyPCA$x[,1:8], phy= meanshape_gdf$Phy, iter = 999, lambda = c("mean"), seed = NULL, tol = 1e-04, PAC.no = 21, print.progress = FALSE, verbose = FALSE)

#PACA 90% tip dispersion

Th_physig.DelphinidaePACA90<-physignal.z(A= Delphinidae_PACA$x[,1:10], phy= meanshape_gdf$Phy, iter = 999, lambda = c("mean"), seed = NULL, tol = 1e-04,PAC.no = 21, print.progress = FALSE, verbose = FALSE)

summary(Th_physig.DelphinidaePACA90)

# FiloANOVA

filoANOVA_Delphinidae<-procD.pgls(coords~ log(CS)+ H, Phy, inter=10000, print.progress = FALSE,SS.type = "II", data = meanshape_gdf)

PhyPCA<- Delphinidae_PhyPCA $x[,1:8]

filoANOVA_DelphinidaePhyPCA<-procD.pgls(PhyPCA~ log(CS)+ H, Phy, inter=10000, SS.type = "II", print.progress = FALSE, data = meanshape_gdf)

PW <- pairwise(filoANOVA_DelphinidaePCA, groups=filoANOVA_DelphinidaePCA$data$H, covariate = NULL)

summary(PW, test.type = "dist", confidence = 0.95, stat.table = TRUE)

#Parameters for wireframe graphics

GPref<- gridPar(pt.bg = "white", pt.size =0.4, link.col="gray", link.lwd=1.3, tar.pt.bg = "black", tar.pt.size = 1, tar.link.col = "black")

#Wireframe for Th

meanshape<-mshape(gdf_delph$coords)

frame <- matrix(c(1,1,10,10, 2,6,6,3,3,7,7,4,4,8,8,5,5,9,9,2,28,24,24,31,31,27,27,30,30,26,26,29,29,25,25,28,6,21,21,9,21,20,20,22,22,10,10,11,11,12,12,14,14,13,13,16,16,17,17,18,18,19,19,21,14,31,14,28,14,34,34,35,35,15,

15,33,33,32,32,21,6,28,3,25,7,29,4,26,8,30,5,27,9,31,2,24), ncol = 2, byrow = TRUE)

# Wireframe for ThTo, Tm and SP:

frame <- matrix(c(1,1,21,21,2,6,6,3,3,7,7,4,4,8,8,5,5,9,9,2,22,26,26,23,23,27,27,24,24,28,28,25,25,29,29,22,3,34, 34,35,35,20,20,10,10,11,11,37,37,36,36,23,25,40,40,41,41,14,14,15,15,16,16,39,39,38,38,5,2,19,19,17,19,18,17,30,18,30,30,31,31,13,13,33,33,32,32,12,12,22,2,22,6,26,3,23,7,27,4,24,8,28,5,25,2,22,9,29), ncol = 2, byrow = TRUE)

# Wireframe for TS:

frame <- matrix(c(1,1,18,18,2,6,6,3,3,7,7,4,4,8,8,5,5,9,9,2,19,23,23,20,20,24,24,21,21,25,25,22,22,26,26,19,2,14,14,12,14,13,12,15,13,15,15,16,16,17,17,19,7,10,10,4,4,11,11,8,24,27,27,21,21,28,28,25,2,19,6,23,3,20,7,24,10,27,4,21,11,28,25,8,22,5,26,9), ncol = 2, byrow = TRUE)
